# Supplementary material
Source: Springer Nature journal article supplement (https://www.springermedizin.de/resource/supplementary/13601_2013_634_MOESM1_ESM.pdf/9677880)
Supplement: MOESM1 [file 9677880]

## Additional File 1

**Table S1. Primers and probes used in qPCR**

| Gene     | Type          | Sequence                   |
|----------|---------------|----------------------------|
| POSTN    | outer-forward | GCAAACCACCTTCACGGATCT      |
|          | outer-reverse | TTATTCACAGGTGCCAGCAAAG     |
|          | inner-forward | CGGATCTTGTGGCCCAATT        |
|          | inner-reverse | AGGTGCCAGCAAAGTGTATTCTC    |
|          | probe         | CTTGGCATCTGCTCTGAGGCC      |
| CLCA1    | outer-forward | CCAGGCATTGCTAAGGTTGG       |
|          | outer-reverse | ACTGGCCCTGAGAATTGGG        |
|          | inner-forward | CCTTGACCCTGACTGTCACGT      |
|          | inner-reverse | TTGTTTCGTTTTGGAAGTCACTGTAA |
|          | probe         | TGCGTCCAATGCTACCCTGCCTC    |
| SERPINB2 | outer-forward | CTGAAGTGTTCCACCAAGCCA      |
|          | outer-reverse | CAAACCTGTGGGCCTCCATGT      |
|          | inner-forward | GTGAATGAGGAGGGCACTGAA      |
|          | inner-reverse | CCATGTCCAGTTCTCCCTGTC      |
|          | probe         | TAAACCTCCTGTGCCAGCGGCTG    |
| EEF1A1   | outer-forward | TGCTAACATGCCTTGGTTCAAG     |
|          | outer-reverse | TTGGACGAGTTGGTGGTAGGAT     |
|          | inner-forward | CCTTGGTTCAAGGGATGGAA       |
|          | inner-reverse | GCCTCAAGCAGCGTGGTT         |
|          | probe         | CACTGGCATTGCCATCCTTACGGG   |
| PPIA     | outer-forward | ATGAGAACTTCATCCTAAAGCATACG |
|          | outer-reverse | TTGGCAGTGCAGATGAAAACT      |
|          | inner-forward | ACGGGTCCTGGCATCTTGT        |
|          | inner-reverse | GCAGATGAAAACTGGGAACCA      |
|          | probe         | ATGGCAAATGCTGGACCCAACACA   |
| RPL13A   | outer-forward | GGACCGTGCGAGGTATGCT        |
|          | outer-reverse | TTCAGACGCACGACCTTGAG       |
|          | inner-forward | TATGCTGCCCCACAAAACC        |
|          | inner-reverse | TGCCGTCAAACACCTTGAGA       |
|          | probe         | CAGAGCGGCCTGGCCTCGCT       |

|        |               |                            |
|--------|---------------|----------------------------|
| DNAJA1 | outer-forward | AGAGTGCTGTCCCAATTGCC       |
|        | outer-reverse | CTTTAGGACTGATCCGCTCCC      |
|        | inner-forward | GACCTGGAATGGTTCAGCAAA      |
|        | inner-reverse | GACTGATCCGCTCCCATG         |
|        | probe         | CCCTGGCACTCCATGCACACAGACT  |
| ACTB   | outer-forward | TTGCCGACAGGATGCAGAA        |
|        | outer-reverse | GCCGATCCACACGGAGTACTT      |
|        | inner-forward | CCTGGCACCCAGCACAAT         |
|        | inner-reverse | GCCGATCCACACGGAGTACT       |
|        | probe         | TCAAGATCATTGCTCCTCCTGAGCGC |

Probes used a 5' FAM fluorescent probe with a 3' BHQ quencher.

**Table S2. Correlation between epithelial three-gene-mean, POSTN, SERPINB2, CLCA1, and non-invasive markers of inflammation and airway hyperresponsiveness.**

|                        | <b>FeNO</b><br>n=19 pre-ICS<br>n=18 post-ICS | <b>Blood eosinophils</b><br>n=24 pre-ICS<br>n=21 post-ICS | <b>Total serum IgE</b><br>n=24 pre-ICS<br>n=20 post-ICS | <b>PC<sub>20</sub></b><br>n=24 pre-ICS | <b>Mean of blood eos., FeNO, PC<sub>20</sub>*</b><br>n=19 pre-ICS |
|------------------------|----------------------------------------------|-----------------------------------------------------------|---------------------------------------------------------|----------------------------------------|-------------------------------------------------------------------|
| <b>three-gene-mean</b> |                                              |                                                           |                                                         |                                        |                                                                   |
| Pre-ICS                | r=0.75; p=0.0002                             | r=0.58; p=0.003                                           | r=0.33; p=0.11                                          | r=-0.65; p=0.0006                      | r=0.79; p=5.2e-5                                                  |
| Post-ICS               | r=0.53; p=0.02                               | r=0.4; p=0.07                                             | r=0.42; p=0.07                                          | –                                      | –                                                                 |
| <b>POSTN</b>           |                                              |                                                           |                                                         |                                        |                                                                   |
| Pre-ICS                | r=0.71; p=0.0007                             | r=0.54; p=0.006                                           | r=0.43; p=0.037                                         | r=-0.57; p=0.004                       | r=0.72; p=0.0004                                                  |
| Post-ICS               | r=0.56; p=0.02                               | r=0.26; p=0.25                                            | r=0.30; p=0.20                                          | –                                      | –                                                                 |
| <b>SERPINB2</b>        |                                              |                                                           |                                                         |                                        |                                                                   |
| Pre-ICS                | r=0.67; p=0.002                              | r=0.48; p=0.017                                           | r=0.17; p=0.42                                          | r=-0.63; p=0.001                       | r=0.72; p=0.0004                                                  |
| Post-ICS               | r=0.27; p=0.28                               | r=0.29; p=0.21                                            | r=0.38; p=0.10                                          | –                                      | –                                                                 |
| <b>CLCA1</b>           |                                              |                                                           |                                                         |                                        |                                                                   |
| Pre-ICS                | r=0.76; p=0.0002                             | r=0.65; p=0.0006                                          | r=0.33; p=0.11                                          | r=-0.67; p=0.0004                      | r=0.82; p=1.5e-5                                                  |
| Post-ICS               | r=0.56; p=0.02                               | r=0.51; p=0.02                                            | r=0.40; p=0.08                                          | –                                      | –                                                                 |

FeNO (ppb), blood eosinophils (K/ $\mu$ l), total serum IgE (IU/ml), and PC<sub>20</sub> (mg/ml) were log-transformed. Gene expression values were centered (by mean) and scaled (by standard deviation) across all samples for that gene.

\* Blood eosinophils, FeNO, and 1/PC<sub>20</sub> were log-transformed, and then centered and scaled prior to taking a mean.

**Table S3. Comparative ROC analysis between baseline three-gene-mean and other potential baseline predictors of ICS response**

|                                              | AUC (number of subjects) |           |                  |           |
|----------------------------------------------|--------------------------|-----------|------------------|-----------|
|                                              | Primary Cohort           |           | Secondary Cohort |           |
|                                              | 4 weeks                  | 8 weeks   | 4 weeks          | 8 weeks   |
| three-gene-mean                              | 0.94 (23)                | 0.87 (22) | 0.77 (16)        | 0.91 (15) |
| POSTN                                        | 0.88 (23)                | 0.81 (22) | 0.79 (16)        | 0.89 (15) |
| SERPINB2                                     | 0.94 (23)                | 0.88 (22) | 0.71 (16)        | 0.82 (15) |
| CLCA1                                        | 0.88 (23)                | 0.81 (22) | 0.75 (16)        | 0.86 (15) |
| blood eosinophils                            | 0.91 (23)                | 0.84 (22) | 0.5 (16)         | 0.76 (15) |
| FeNO                                         | 0.81 (17)                | 0.70 (16) | –                | –         |
| PC <sub>20</sub>                             | 0.88 (23)                | 0.79 (22) | 0.43 (16)        | 0.49 (15) |
| mean of blood eos., FeNO, PC <sub>20</sub> * | 0.93 (17)                | 0.82 (16) | –                | –         |
| total serum IgE                              | 0.63 (23)                | 0.58 (22) | 0.56 (16)        | 0.75 (15) |

\* Blood eosinophils, FeNO, and 1/PC<sub>20</sub> were log-transformed, and then centered and scaled prior to taking a mean.

**Figure S1. Schema of cohorts contributing data to this manuscript**

**A. Primary Cohort<sup>1</sup>**

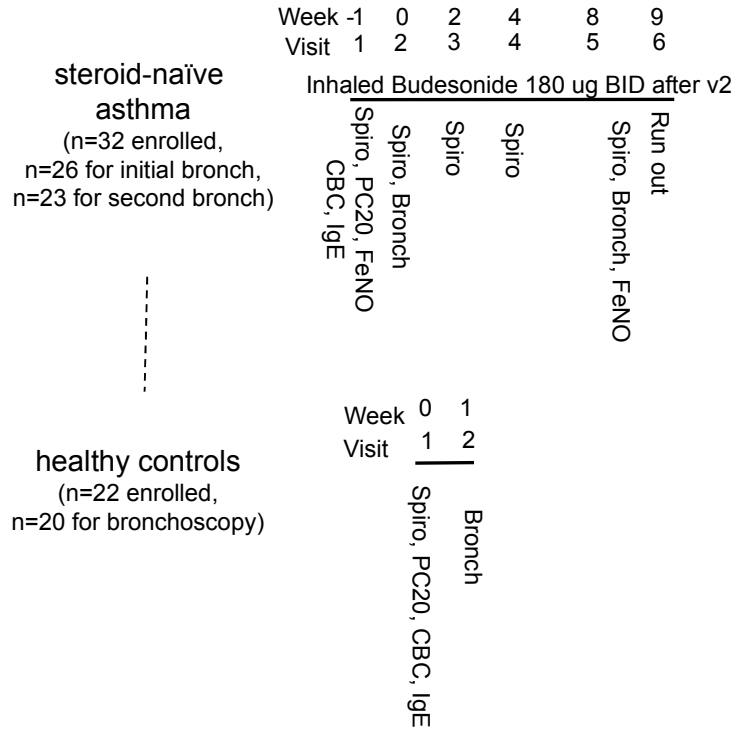

**B. Secondary Cohort<sup>2</sup>**

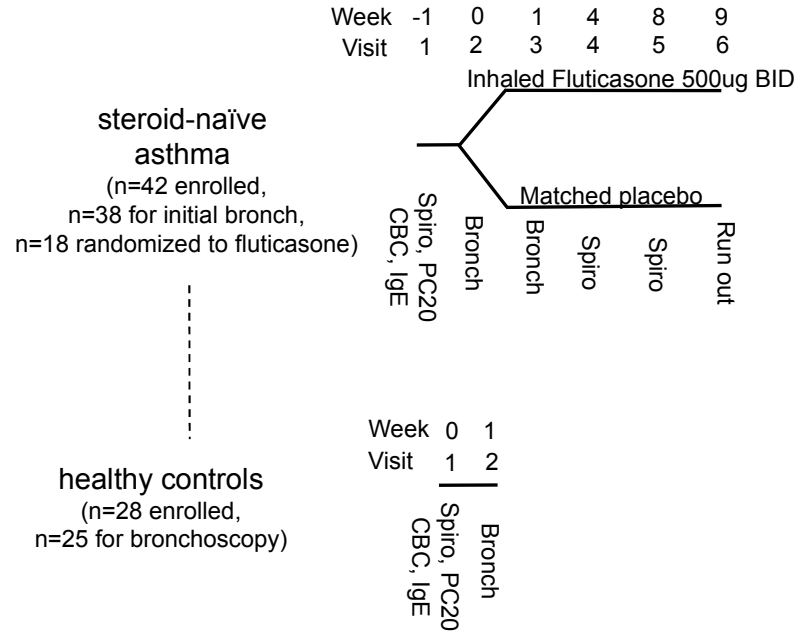

**Other findings from these cohorts previously published in:**

<sup>1</sup>Solberg OD et al. Airway Epithelial miRNA Expression Is Altered in Asthma. AJRCCM. 2012.

<sup>2</sup>Woodruff PG et al. Genome-wide profiling identifies epithelial cell genes associated with asthma and with treatment response to corticosteroids. PNAS. 2007.

<sup>2</sup>Woodruff PG et al. T-helper Type 2-driven Inflammation Defines Major Subphenotypes of Asthma. AJRCCM. 2009

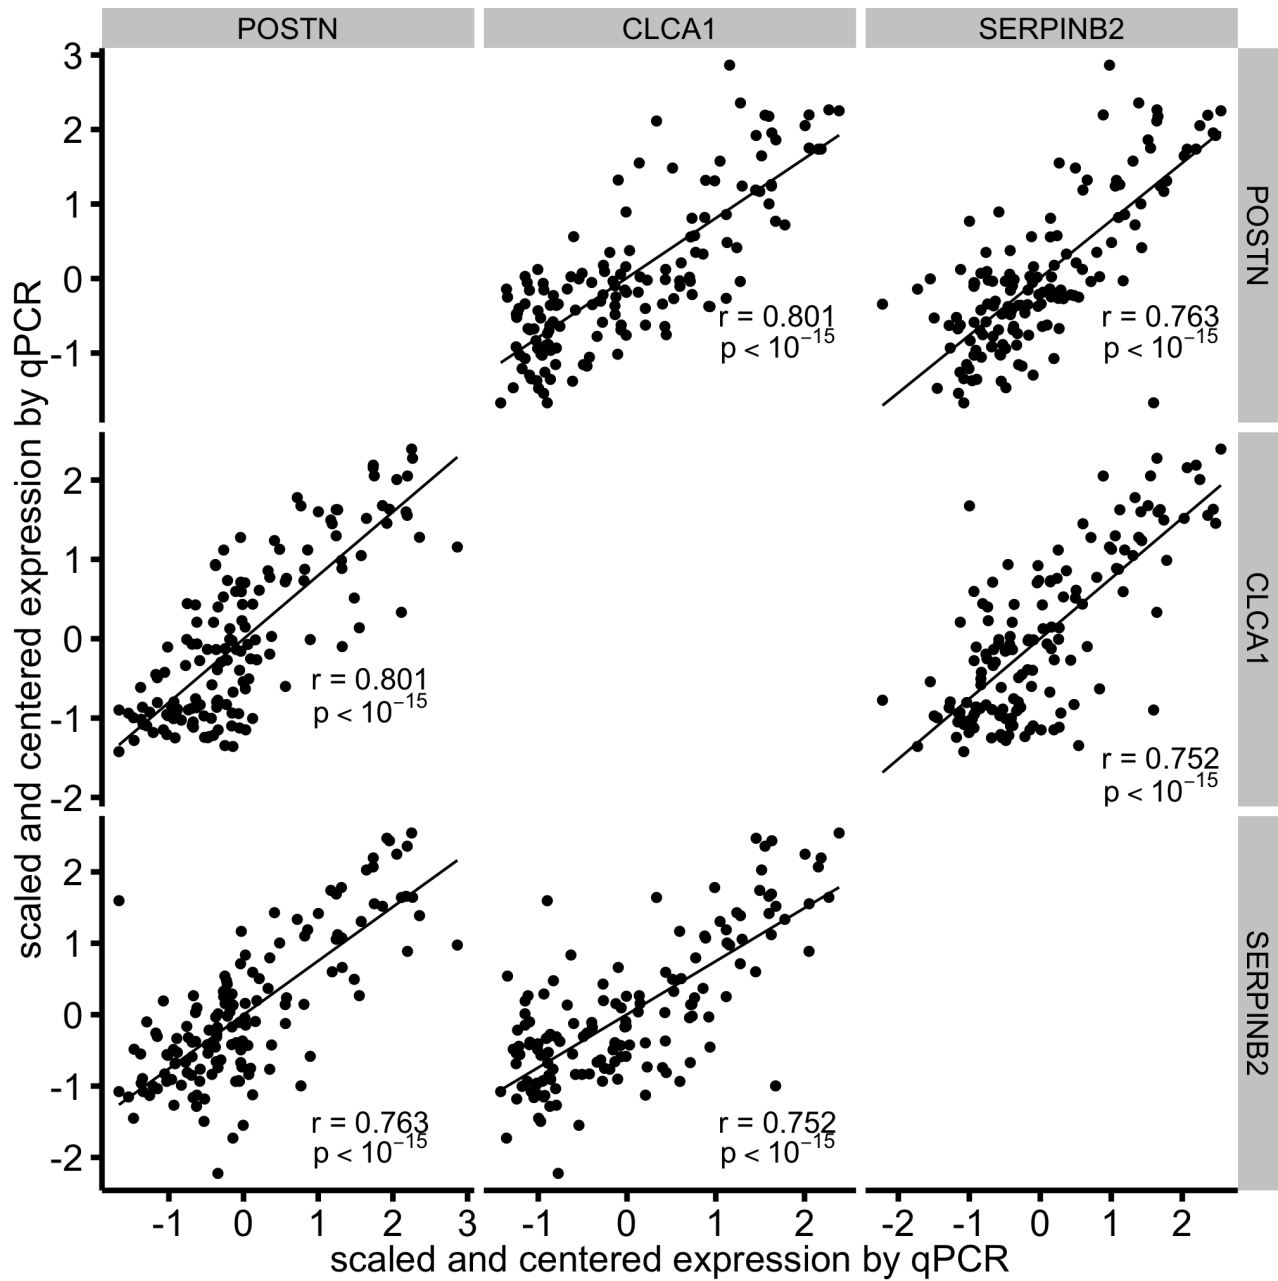

**Figure S2. Correlation between the centered and scaled qPCR expression values for POSTN, CLCA1, SERPINB2.** Data points are from both the primary and secondary cohorts and include healthy controls, subjects with asthma not on ICS, and subjects with asthma on ICS.

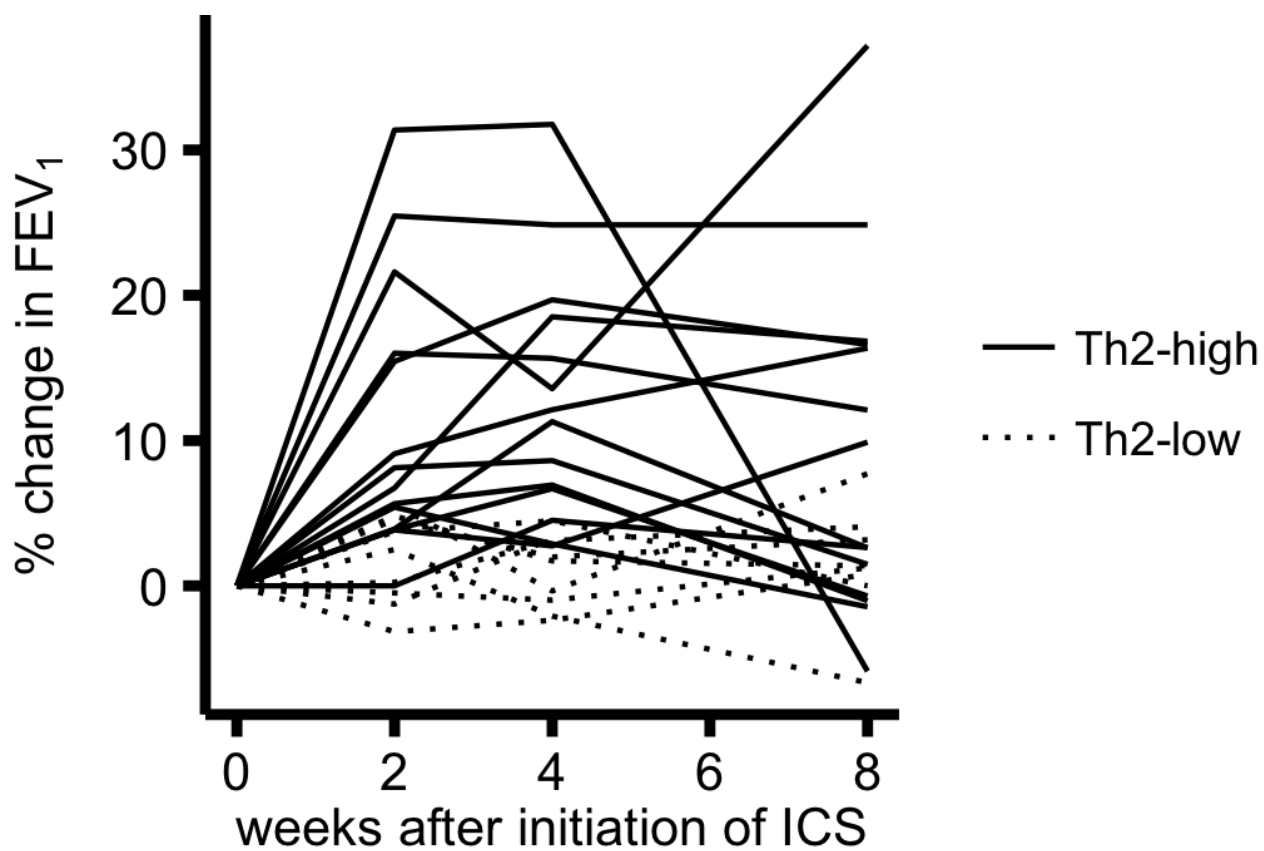

**Figure S3. Individual FEV<sub>1</sub> responses across 8 week treatment with ICS in subjects with asthma.** Percent change in pre-bronchodilator FEV<sub>1</sub> is relative to week 0. Dotted and solid lines represent Th2-low and Th2-high subjects respectively, with Th2-high defined as a three-gene-mean greater than a value of 0.1.

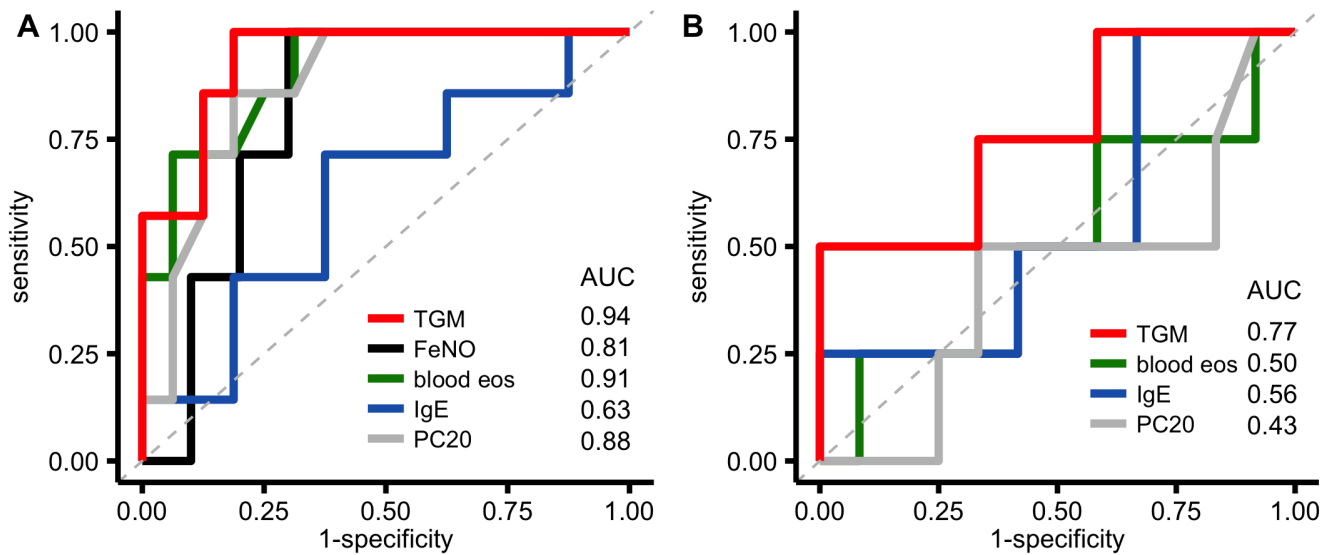

**Figure S4. Predictive performance of three-gene-mean and other markers of Th2 inflammation for ICS response at 4 weeks.** Receiver operating characteristic (ROC) curves were made to assess the ability of the three-gene-mean and other markers to predict an improvement in FEV<sub>1</sub> after 4 weeks of ICS. Improvement in FEV<sub>1</sub> was defined as an increase of at least 200 ml and 12% relative to week 0. A. ROC curves for baseline measurements of three-gene-mean, FeNO, blood eosinophils, total serum IgE, and PC<sub>20</sub> to methacholine in the primary study. Seven out of 23 subjects had an improvement in FEV<sub>1</sub>. For the three-gene-mean, the cutoff of 0.5 (suggested by the two peaks in Figure 1) has a sensitivity of 100% and a specificity of 69%, a cutoff of 0.1 (mean + 2SD of the healthy distribution) has a sensitivity of 100% and a specificity of 56%, and an alternate cutoff that maximizes the sum of sensitivity and specificity at a three-gene-mean of 0.57 has a sensitivity of 100% and a specificity of 81%. B. ROC curves for the secondary cohort to validate the findings in panel A. Four out of 16 subjects had an improvement in FEV<sub>1</sub>. For the three-gene-mean, the cutoff of 0.5 has a sensitivity of 100% and a specificity of 42%, a cutoff of 0.1 (mean + 2SD of the healthy distribution) has a sensitivity of 100% and a specificity of 33%, and an alternate cutoff that maximizes the sum of sensitivity and specificity at a three-gene-mean of 0.57 has a sensitivity of 75% and a specificity of 42%. In both panels, the line of unity is represented by a dashed gray line, corresponding to an AUC of 0.5.
